# 1 **Lineage does not regulate the connectivity of projection neurons in the mouse olfactory bulb**

2 Luis Sánchez-Guardado<sup>1</sup> and Carlos Lois<sup>1\*</sup>

3 <sup>1</sup>Division of Biology and Biological Engineering, California Institute of Technology, Pasadena, California, USA

## 4 **Abstract**

5 Lineage regulates the synaptic connections between neurons in some regions of the invertebrate  
6 nervous system. In mammals recent experiments suggest that cell lineage determines the  
7 connectivity of pyramidal neurons in the neocortex, but the functional relevance of this  
8 phenomenon and whether it occurs in other neuronal types remains controversial. We investigated  
9 whether lineage plays a role in the connectivity of mitral and tufted cells, the projection neurons  
10 in the mouse olfactory bulb. We used transgenic mice to label neuronal progenitors sparsely and  
11 observed that clonally related neurons receive synaptic input from olfactory sensory neurons  
12 expressing different olfactory receptors. These results indicate that lineage does not determine the  
13 connectivity between olfactory sensory neurons and olfactory bulb projection neurons.

14 Key words: cell lineage, olfactory bulb, projection neurons, mitral cell, tufted cell, connectivity

15 \*Correspondences: [clois@caltech.edu](mailto:clois@caltech.edu)

16

17 **Acknowledgements:** We are grateful to Walter G. Gonzalez and Antuca Callejas for comments on the  
18 manuscript.

## 19 **Introduction**

20 The relationship between cell lineage and neuronal connectivity in the brain is not well understood.  
21 Lineage regulates the synaptic connections between neurons in some regions of the invertebrate  
22 nervous system. For example, in the *Drosophila* olfactory system, projection neurons are specified  
23 by cell lineage to receive synaptic input from the axons of specific types of olfactory sensory  
24 neurons (OSNs) (Jefferis et al., 2001; Li et al., 2018). In mammals it has been reported that clonally  
25 related pyramidal neurons are preferentially connected to each other in the neocortex (Yu et al.,  
26 2009; 2012; He et al., 2015). Furthermore, it has been proposed that sister neurons in the visual  
27 cortex have a strong correlation to the stimuli to which they respond (Li et al., 2012), while other  
28 works suggest that this correlation is much weaker (Ohtsuki et al., 2012). To further investigate  
29 the role played by lineage in the assembly of brain circuits we focused on the mammalian olfactory  
30 bulb, a brain region with an anatomical organization particularly advantageous to study this  
31 question.

32 The mammalian olfactory system can be divided into three regions: olfactory epithelium, olfactory  
33 bulb (OB) and olfactory cortex. The olfactory epithelium harbors the OSNs. Each OSN expresses  
34 just one of more than one thousand odorant receptors (Buck and Axel, 1991; Chess et al., 1994).  
35 OSN axons expressing the same odorant receptor converge into one or two discrete neuropil  
36 structures in each OB called glomeruli, forming a stereotypic map on the OB surface (Ressler et  
37 al., 1994; Vassar et al., 1994; Mombaerts et al., 1996; Wang et al., 1998). The projection neurons  
38 in the OB are called mitral and tufted cells (M/T cells). In mammals the majority (>90%) of M/T  
39 cells have a single apical dendrite that branches into a single glomerulus (Mori, 1987; Shepherd  
40 and Shepherd, 1990; Malun and Brunjes, 1996) where they receive sensory input from OSNs  
41 expressing a particular odor receptor (Figure 1A) (Ressler et al., 1994; Vassar et al., 1994). Thus,  
42 the anatomical organization of the glomerulus in the OB is an ideal system to investigate the  
43 possible relationship between lineage and connectivity because the apical dendrite of the M/T cells  
44 provides a direct readout of their synaptic input. To address this question we sparsely labeled M/T  
45 cells progenitors and investigated the sensory input that their progeny receives from OSNs. Our  
46 results show that sister M/T cells receive synaptic input from different glomeruli, indicating that  
47 lineage does not determine the neuronal connectivity of the OB projections neurons, and suggest  
48 that the assembly of the OB mostly depends on non-genetic mechanisms.

## 49 **Results and discussion**

### 50 Labeling of progenitors of OB projection neurons

51 The projection neurons in the OB are called mitral and tufted cells (M/T cells). M/T cells originate  
52 from progenitors located in the OB primordium, which is derived from the anterior part of the  
53 dorsal telencephalon (Hinds, 1968a, 1968b). To investigate the lineage of M/T cells, we crossed  
54 two transgenic mouse, *Nestin-CreER<sup>T2</sup>* (Kuo et al., 2006), which can be used to label neuronal  
55 progenitors in a sparse manner, with the *Confetti* line (Snippert et al., 2010), which can label  
56 individual cells with one out four possible fluorescent proteins upon Cre-mediated recombination  
57 (Figure 1B, C and Figure 1-figure supplement 1).

58 In order to optimize the conditions to label just a handful of progenitors, ideally a single progenitor  
59 per OB, we performed some preliminary experiments. First, we confirmed that our transgenic mice  
60 *Nestin-CreER<sup>T2</sup>::Confetti* did not label any neurons in the brain without tamoxifen (TMX)  
61 administration (n=3; data not shown). Second, we found that with an injection of 1 mg of TMX  
62 per 40 grams of body weight into a 10-day pregnant female (E10.5) we observed a handful of  
63 pyramidal neuron clones in the neocortex, and around 20 M/T cells labeled in the OB when the  
64 brains were examined at postnatal day 21 (P21) (Figure 1B and and Figure 1-figure supplement  
65 1). Third, we confirmed that this TMX concentration labeled a few progenitors per brain when  
66 animals were analyzed two days after TMX administration (E12.5). With these conditions, we  
67 observed between none to a single progenitor labeled per fluorescent protein in the OB (n=6)  
68 (Figure 2). Although we observed a very low number of progenitors labeled, we cannot determine  
69 whether a group of cells labeled at P21 with the same fluorescent protein in the OB originated  
70 from a single progenitor, or from two independent progenitors. However, here we will work under  
71 the assumption that any group of M/T cells labeled with the same fluorescent protein in the OB  
72 are part of a single clone.

73 To study the lineage of the M/T cells we induced Cre activity at E10.5, the peak time for mitral  
74 cell generation (Hinds, 1968a, 1968b; Blanchart et al., 2006; Kim et al., 2011; Imamura et al.,  
75 2011). Brains were analyzed at P21, once M/T completed the refinement of their dendrites and  
76 they have a mature morphology with a single apical dendrite projecting into a single glomerulus  
77 (Figure 1A) (Malun and Brunjes, 1996; Lin et al., 2000; Matsutani and Yamamoto, 2000;  
78 Blanchart et al., 2006). *Confetti* mice can produce four different fluorescent proteins with distinct

79 subcellular locations (cytosolic (cRFP and cYFP), membrane (mCFP), and nuclear (nGFP))  
80 (Figure 1C, Figure 1-figure supplement 1 and Figure 2-figure supplement 1) (Snippert et al., 2010).  
81 Consistent with previous works, we observed that the majority of clones in the OB were labeled  
82 by RFP (n=9), whereas YFP (n=4) and CFP (n=1) clones appeared less frequently (Reeves et al.,  
83 2018). However, we did not analyze any of the nGFP+ cells for two reasons. First, the most reliable  
84 way to unambiguously identify M/T cells is by their distinctive morphology. However, if a cell is  
85 only labeled in the nucleus (as in nGFP+ cells), we cannot tell apart M/T cells from other OB cell  
86 types (e.g., short axon cells, granule cells, juxtaperiglomerular). Second, to identify the  
87 connectivity between M/T cells and glomeruli, it is necessary to follow the projection of their  
88 apical dendrites (Figure 1-figure supplement 1), and we cannot observe any dendrites in the nGFP+  
89 cells.

90 In total, we analyzed 29 OBs, and 13 of them did not have any labeled cells. Out of the 16 OBs  
91 with labeled cells, 14 OBs had both M and T cells, and 2 OBs had only M cells labeled (with 3  
92 and 4 M cells labeled per OB). We do not know the reason why these two OBs showed only M  
93 cells, and several reasons may account for this observation, including progenitors committed to  
94 produced only M cells, or labelling of intermediate progenitor that underwent few cell divisions.  
95 We did not find any OB with only T cells.

#### 96 *Size of clones and distribution of neurons in the OB and neocortex*

97 We measured the putative clone size in the OB and compared them with neocortex clones. We  
98 found that putative clones in the OB contained  $22.14 \pm 6.61$  M/T cells (average  $\pm$  standard  
99 deviation, n= 310), while neocortex clones contained  $92.67 \pm 23.18$  pyramidal neurons (n=556),  
100 consistent with previous results (Franco et al., 2012; Gao et al., 2014) (Figure 3A). These  
101 observations suggest that the clone size in the neocortex is four times larger than a clone in the  
102 OB, consistent with the reported different modes of neurogenesis in each of these two brain regions  
103 (Cárdenas et al., 2018).

104 We analyzed the distribution of cell bodies of 9 OB clones (n=178 neurons) and 6 neocortex clones  
105 (n=556 neurons) by performing 3D reconstructions using the NeuroLucida software (Figure 3B-D  
106 and Figure 3-figure supplement 1). The 3D reconstructions revealed that sister M/T cells were  
107 distributed in a broader area than the tight columns of sister pyramidal neurons. To analyze the

108 distribution of cells from each clone, we calculated the nearest neighbor distance (NND) based in  
109 our 3D reconstructions using NeuroLucida Explorer (Figure 3E and Figure 3-figure supplement 2).  
110 We found that sister M/T cells were more separated from each other ( $283.96 \mu\text{m} \pm 70.28$ ; average  
111  $\pm$  standard deviation) than sister pyramidal neurons ( $65.45 \mu\text{m} \pm 19.4$ ) (Figure 3E). The  
112 distribution of sister M/T cells that we observed is consistent with the tangential migration of  
113 immature M/T cells reported in the embryonic OB (Blanchart et al., 2006; Imamura et al., 2011).

114 To investigate whether the distribution of sister M/T cells observed was random, we compared the  
115 NNDs of the labeled M/T cells observed ( $n=178$ ) with a simulated random dataset. The same  
116 strategy was followed for neocortex clones. We found that the NNDs between clonally related  
117 neurons were shorter than the simulated random datasets both for the OB and neocortex (Figure  
118 3E). Similar results were reported for pyramidal neurons in the neocortex (Gao et al., 2014). This  
119 indicates that although sister M/T cells are not clustered as pyramidal neurons, their distribution  
120 in the OB is not random. Interestingly, a previous work have observed that the tangential migration  
121 of immature M/T cells in the embryonic OB may be regulated by gradients of secreted molecules,  
122 limiting their distribution to specific regions within the OB (Inokuchi et al., 2017).

### 123 Connectivity of sister M/T cells

124 It has been proposed that the anatomical organization of the OB may be analogous to the neocortex  
125 columnar organization. In the neocortex it is thought that the pyramidal neurons forming part of a  
126 column perform a similar task (Mountcastle, 1997). Similarly, M/T cells receiving synaptic input  
127 from the same glomerulus may also perform a similar task (Kauer and Cinelli, 1993; Mori et al.,  
128 1999; Bozza et al., 2002). Our results indicate that sister M/T cells are widely distributed  
129 throughout the OB (Figure 3). Based on this observation, it seems unlikely that sister M/T cells  
130 would have apical dendrites projecting into the same glomerulus. Although improbable, this could  
131 still be possible because the soma of M/T cells innervating the same glomerulus may be separated  
132 from each other up to  $450 \mu\text{m}$  (for M cells) and  $350 \mu\text{m}$  (for T cells) (Liu et al., 2016). To investigate  
133 whether sister M/T cells receive synaptic input from the same glomerulus, we tracked their apical  
134 dendrites (Figure 4). Among all the labeled M/T cells that we detected ( $n=310$ , from 14 putative  
135 M/T clones) we never observed two neurons innervating the same glomerulus, even when their  
136 cell bodies were near each other (Figure 4B-E). Nevertheless, it is still possible that, although we  
137 did not observe them, there may exist clones of M/T cells genetically pre-determined to project to

138 the same glomerulus. This scenario could be expected for putative glomeruli responsive to relevant  
139 odors for survival, such as those responsive to predators or poisons, which require an innate and  
140 hardwired response of avoidance (Sosulski et al., 2011). Future experiments analyzing a much  
141 larger number of clones than those detected here may reveal the existence of these putative  
142 “hardwired” M/T clones.

143 In summary, our results indicate that lineage does not determinate the input connectivity of the  
144 projection neurons in the mammalian OB. This is in contrast to what has been described for  
145 projection neurons in the *Drosophila* antennal lobe (Jefferis et al., 2001) and suggested for  
146 pyramidal neurons in the rodent visual cortex (Li et al., 2012). Our results suggest that the sensory  
147 input received by M/T cells is regulated by non-genetic factors, consistent with the observations  
148 from recent works. For example, it has been shown that sensory odor experience starting *in utero*  
149 recruits the apical dendrites of M/T cells to the activated glomeruli (Liu et al., 2016).

150 Is there any biological advantage to the dispersion of sister projection neurons in the OB?  
151 Interestingly, it has been proposed that the M/T cells receiving input from the same glomerulus  
152 exhibit a wide diversity in their biophysical properties, and this diversity may be important for  
153 neural coding (Padmanabhan and Urban, 2010). In addition, neurons in the piriform cortex receive  
154 synaptic input from M/T cells innervating different glomeruli (Miyamichi et al., 2011), whereas  
155 M/T cells connected to the same glomerulus project their axons into many different areas of the  
156 olfactory cortex (Ghosh et al., 2011; Sosulski et al., 2011). However, the connectivity between  
157 M/T cells and the amygdala appears to be more stereotypical than between the M/T cells and other  
158 targets in the olfactory cortex (anterior olfactory nucleus, piriform cortex, tenia tecta, olfactory  
159 tubercle, cortical amygdala and entorhinal cortex) (Haberly, 2001; Sosulski et al., 2011). Based on  
160 these observations, one can speculate that the connectivity between the OB and its targets in the  
161 olfactory cortex may occur by two different mechanisms. Genetic factors, including lineage, may  
162 contribute to the connectivity between M/T cells and the amygdala, as this brain area is involved  
163 in innate behavior responses that may require hardwired connections (Sosulski et al., 2011). In  
164 contrast, the connectivity between M/T cells and areas of the olfactory cortex involved in the  
165 perception of odors that do not elicit innate behaviors are more plastic and may be regulated by  
166 non-genetic mechanisms, such as activity-dependent wiring, among others (Caron et al., 2013;  
167 Schaffer et al., 2018).

168 Our results indicating that lineage does not determine the synaptic input of M/T cells raise further  
169 questions about the assembly of the olfactory circuits, including which are the mechanisms that  
170 regulate the connectivity between M/T cells and OSNs, the role that experience may play sculpting  
171 the odor representations in the piriform cortex, and whether lineage regulates the connections with  
172 the amygdala to trigger innate behaviors.

## 173 **Materials and Methods**

### 174 **Animals**

175 *Nestin-CreER<sup>T2</sup>* and *Confetti* mice were obtained from Jackson Laboratory. The *Nestin-CreER<sup>T2</sup>*  
176 mice can be used to induce the activity of Cre recombinase in neuronal progenitors by the  
177 administration of tamoxifen (TMX) into animals (Kuo et al., 2006). The *Confetti* mouse is a Cre-  
178 dependent reporter that produces four different fluorescent proteins (Snippert et al., 2010). We  
179 crossed the *Nestin-CreER<sup>T2</sup>* mouse with the *Confetti* mice, and the resulting transgenic *Nestin-*  
180 *CreER<sup>T2</sup>::Confetti* mouse was used for the experiments. For the timed pregnancy, the plug date  
181 was designated as E0.5 and the day of birth as P0. In all experiments, mice were handled according  
182 to the protocols approved by the Caltech Institutional Animal Care and Use Committee (IACUC).  
183 Mice colonies were maintained at the animal facility of the California Institute of Technology  
184 (Caltech).

### 185 **Tamoxifen induction.**

186 Tamoxifen (TMX, Sigma T-5648) was dissolved in 37°C pre-warmed corn oil (Sigma C8267) at  
187 a concentration of 10 mg/ml. *NestinCreER<sup>T2</sup>::Confetti* embryos were induced at E10.5 (embryonic  
188 day 10.5) by a single intraperitoneal injection of 1 mg TMX into pregnant females (~ 40 grams).  
189 Animals were euthanized at embryonic day 12 (E12.5) or postnatal day 21 (P21).

### 190 **Tissue processing, immunohistochemistry, and imaging**

191 Mouse embryos (E12.5) were fixed by immersion in 4% paraformaldehyde (PFA) in phosphate-  
192 buffered saline (PBS, pH 7.4) at 4°C overnight. Postnatal mice (P21) were fixed by intracardiac  
193 perfusion with 4 % PFA in PBS. Brains were then extracted and incubated in 4% PFA at 4°C  
194 overnight. Next day, all samples were washed 3 times, 10 minutes each, with 0.1 M PBS, pH 7.4.  
195 Postnatal mice brains were embedded into 3 % agarose and cut in a vibratome into 60 µm thick  
196 sections. Sections were collected sequentially. Embryonic brains were cut with a cryostat into 20  
197 µm thick sections as previously described (Sánchez-Guardado et al., 2009).

198 We amplified the signal from fluorescent proteins by performing immunohistochemistry with  
199 antibodies against RFP and GFP. Although anti-GFP antibody recognizes nGFP, cYFP and mCFP  
200 proteins, we were able to distinguish between them based on the different subcellular location of  
201 the proteins (nuclear, cytoplasmic and membrane). In the figures cells are shown with their original



202 colors from the *Confetti* cassette, even though the signal from cYFP and mCFP proteins was  
203 amplified using the antibody against GFP (Figure 1-figure supplement 1, Figure 2, Figure 2-figure  
204 supplement 1). We did not include nGFP+ cells in our analyses because we cannot identify their  
205 morphology.

206 For immunocytochemistry, we incubated the sections during 30 minutes in blocking solution  
207 containing 1% bovine serum albumin in 0.1 M PBS-0.1% Triton X-100 (PBS-T). Sections were  
208 incubated overnight with the following antibodies diluted into blocking solution: chicken anti-GFP  
209 (1:1,000; AB3080; Millipore Bioscience Research Reagents), rabbit anti-RFP (1:1,000; LS-  
210 C60076; Lifespan). The next day sections were washed 3 times, 10 minutes each, in PBS-T. Later,  
211 sections were incubated during 90 minutes at room temperature with secondary antibodies (Alexa  
212 Fluor 488 goat anti-rabbit, Alexa Fluor 555 goat anti-chicken; Invitrogen) diluted 1:1,500 in  
213 blocking solution. Finally, the sections were counterstained with DAPI (D9542, Sigma), mounted  
214 sequentially on glass slides and mounted with Fluoromount (F4680, Fluoromount Aqueous  
215 Mounting Medium).

216 Z-stacks images were acquired using 10x, 20x or 40x objectives on a confocal microscope (Zeiss  
217 LSM 800). Z-stacks were merged and analyzed using ImageJ and edited with Photoshop (Adobe)  
218 software.

### 219 **3D reconstruction and data analysis.**

220 Each section was analyzed and traced in sequential order from rostral to caudal using NeuroLucida  
221 and StereoInvestigator software (MBF Bioscience Inc., Williston, VT). The boundaries of the OB  
222 and neocortex were traced and used to line up each section with the previous one to form 3D  
223 reconstructions. Each labeled cell in the OB or neocortex was tagged with a blue dot.

224 The distribution of the nearest neighbor distance (NND) was calculated using NeuroLucida  
225 Explorer software based on our 3D reconstruction. NND was calculated by identified the shortest  
226 straight path between labeled cells. The NND was represented as cumulative percentage (average  
227  $\pm$  standard deviation) of the clones analyzed in the OB (n=9) and neocortex (n=6). In addition, we  
228 generated a dataset of random simulations based on the same number of the M/T cells detected in  
229 our experiments (n=178). The distances were generated randomly with a normal distribution  
230 between the longest and shortest distances observed between M/T cells (closest and farthest sister

231 M/T cells were separated by 21.51  $\mu\text{m}$  and 974.82  $\mu\text{m}$ , respectively), and repeated 100 times. We  
232 followed the same procedure for pyramidal neurons (n=556) in the neocortex (closest and farthest  
233 sister pyramidal neurons were separated by 13.54  $\mu\text{m}$  and 415.2  $\mu\text{m}$ , respectively).

234  
235  
236  
237  
238  
239  
240  
241  
242  
243  
244  
245  
246  
247  
248  
249  
250  
251  
252  
253  
254  
255  
256  
257  
258  
259  
260  
261  
262  
263  
264  
265  
266  
267  
268  
269  
270  
271  
272  
273  
274  
275  
276  
277  
278

## Bibliography

- Blanchart A, De Carlos JA, López-Mascaraque L. 2006. Time frame of mitral cell development in the mice olfactory bulb. *J Comp Neurol* **496**:529–543. doi:10.1002/cne.20941
- Bozza T, Feinstein P, Zheng C, Mombaerts P. 2002. Odorant receptor expression defines functional units in the mouse olfactory system. *J Neurosci* **22**:3033–3043. doi:20026321
- Buck L, Axel R. 1991. A novel multigene family may encode odorant receptors: a molecular basis for odor recognition. *Cell* **65**:175–187.
- Cárdenas A, Villalba A, de Juan Romero C, Picó E, Kyrousi C, Tzika AC, Tessier-Lavigne M, Ma L, Drukker M, Cappello S, Borrell V. 2018. Evolution of Cortical Neurogenesis in Amniotes Controlled by Robo Signaling Levels. *Cell* **174**:590-606.e21. doi:10.1016/j.cell.2018.06.007
- Caron SJC, Ruta V, Abbott LF, Axel R. 2013. Random convergence of olfactory inputs in the Drosophila mushroom body. *Nature* **497**:113–117. doi:10.1038/nature12063
- Chess A, Simon I, Cedar H, Axel R. 1994. Allelic inactivation regulates olfactory receptor gene expression. *Cell* **78**:823–834.
- Franco SJ, Gil-Sanz C, Martinez-Garay I, Espinosa A, Harkins-Perry SR, Ramos C, Müller U. 2012. Fate-restricted neural progenitors in the mammalian cerebral cortex. *Science* **337**:746–749. doi:10.1126/science.1223616
- Gao P, Postiglione MP, Krieger TG, Hernandez L, Wang C, Han Z, Streicher C, Papisheva E, Insolera R, Chugh K, Kodish O, Huang K, Simons BD, Luo L, Hippenmeyer S, Shi S-H. 2014. Deterministic progenitor behavior and unitary production of neurons in the neocortex. *Cell* **159**:775–788. doi:10.1016/j.cell.2014.10.027
- Ghosh S, Larson SD, Hefzi H, Marnoy Z, Cutforth T, Dokka K, Baldwin KK. 2011. Sensory maps in the olfactory cortex defined by long-range viral tracing of single neurons. *Nature* **472**:217–220. doi:10.1038/nature09945
- Haberly LB. 2001. Parallel-distributed processing in olfactory cortex: new insights from morphological and physiological analysis of neuronal circuitry. *Chem Senses* **26**:551–576.
- He S, Li Z, Ge S, Yu Y-C, Shi S-H. 2015. Inside-Out Radial Migration Facilitates Lineage-Dependent Neocortical Microcircuit Assembly. *Neuron* **86**:1159–1166. doi:10.1016/j.neuron.2015.05.002
- Hinds JW. 1968a. Autoradiographic study of histogenesis in the mouse olfactory bulb. I. Time of origin of neurons and neuroglia. *J Comp Neurol* **134**:287–304. doi:10.1002/cne.901340304
- Hinds JW. 1968b. Autoradiographic study of histogenesis in the mouse olfactory bulb. II. Cell proliferation and migration. *J Comp Neurol* **134**:305–322. doi:10.1002/cne.901340305
- Imamura F, Ayoub AE, Rakic P, Greer CA. 2011. Timing of neurogenesis is a determinant of olfactory circuitry. *Nat Neurosci* **14**:331–337. doi:10.1038/nn.2754
- Inokuchi K, Imamura F, Takeuchi H, Kim R, Okuno H, Nishizumi H, Bito H, Kikusui T, Sakano H. 2017. Nrp2 is sufficient to instruct circuit formation of mitral-cells to mediate odour-induced attractive social responses. *Nat Commun* **8**:15977. doi:10.1038/ncomms15977
- Jefferis GS, Marin EC, Stocker RF, Luo L. 2001. Target neuron prespecification in the olfactory map of Drosophila. *Nature* **414**:204–208. doi:10.1038/35102574
- Kauer JS, Cinelli AR. 1993. Are there structural and functional modules in the vertebrate olfactory bulb? *Microsc Res Tech* **24**:157–167. doi:10.1002/jemt.1070240207

- 279 Kim EJ, Hori K, Wyckoff A, Dickel LK, Koundakjian EJ, Goodrich LV, Johnson JE. 2011.  
280 Spatiotemporal fate map of neurogenin1 (Neurog1) lineages in the mouse central nervous  
281 system. *J Comp Neurol* **519**:1355–1370. doi:10.1002/cne.22574
- 282 Kuo CT, Mirzadeh Z, Soriano-Navarro M, Rasin M, Wang D, Shen J, Sestan N, Garcia-Verdugo  
283 J, Alvarez-Buylla A, Jan LY, Jan Y-N. 2006. Postnatal deletion of Numb/Numbl-like  
284 reveals repair and remodeling capacity in the subventricular neurogenic niche. *Cell*  
285 **127**:1253–1264. doi:10.1016/j.cell.2006.10.041
- 286 Li H, Shuster SA, Li J, Luo L. 2018. Linking neuronal lineage and wiring specificity. *Neural*  
287 *Dev* **13**:5. doi:10.1186/s13064-018-0102-0
- 288 Li Y, Lu H, Cheng P, Ge S, Xu H, Shi S-H, Dan Y. 2012. Clonally related visual cortical  
289 neurons show similar stimulus feature selectivity. *Nature* **486**:118–121.  
290 doi:10.1038/nature11110
- 291 Lin DM, Wang F, Lowe G, Gold GH, Axel R, Ngai J, Brunet L. 2000. Formation of precise  
292 connections in the olfactory bulb occurs in the absence of odorant-evoked neuronal  
293 activity. *Neuron* **26**:69–80.
- 294 Liu A, Savya S, Urban NN. 2016. Early Odorant Exposure Increases the Number of Mitral and  
295 Tufted Cells Associated with a Single Glomerulus. *J Neurosci* **36**:11646–11653.  
296 doi:10.1523/JNEUROSCI.0654-16.2016
- 297 Malun D, Brunjes PC. 1996. Development of olfactory glomeruli: temporal and spatial  
298 interactions between olfactory receptor axons and mitral cells in opossums and rats. *J*  
299 *Comp Neurol* **368**:1–16. doi:10.1002/(SICI)1096-9861(19960422)368:1;2-7
- 300 Matsutani S, Yamamoto N. 2000. Differentiation of mitral cell dendrites in the developing main  
301 olfactory bulbs of normal and naris-occluded rats. *J Comp Neurol* **418**:402–410.
- 302 Miyamichi K, Amat F, Moussavi F, Wang C, Wickersham I, Wall NR, Taniguchi H, Tasic B,  
303 Huang ZJ, He Z, Callaway EM, Horowitz MA, Luo L. 2011. Cortical representations of  
304 olfactory input by trans-synaptic tracing. *Nature* **472**:191–196. doi:10.1038/nature09714
- 305 Mombaerts P, Wang F, Dulac C, Chao SK, Nemes A, Mendelsohn M, Edmondson J, Axel R.  
306 1996. Visualizing an olfactory sensory map. *Cell* **87**:675–686.
- 307 Mori K. 1987. Membrane and synaptic properties of identified neurons in the olfactory bulb.  
308 *Prog Neurobiol* **29**:275–320.
- 309 Mountcastle VB. 1997. The columnar organization of the neocortex. *Brain* **120 ( Pt 4)**:701–722.
- 310 Ohtsuki G, Nishiyama M, Yoshida T, Murakami T, Histed M, Lois C, Ohki K. 2012. Similarity  
311 of visual selectivity among clonally related neurons in visual cortex. *Neuron* **75**:65–72.  
312 doi:10.1016/j.neuron.2012.05.023
- 313 Padmanabhan K, Urban NN. 2010. Intrinsic biophysical diversity decorrelates neuronal firing  
314 while increasing information content. *Nat Neurosci* **13**:1276–1282. doi:10.1038/nn.2630
- 315 Reeves MQ, Kandyba E, Harris S, Del Rosario R, Balmain A. 2018. Multicolour lineage tracing  
316 reveals clonal dynamics of squamous carcinoma evolution from initiation to metastasis.  
317 *Nat Cell Biol* **20**:699–709. doi:10.1038/s41556-018-0109-0
- 318 Ressler KJ, Sullivan SL, Buck LB. 1994. Information coding in the olfactory system: evidence  
319 for a stereotyped and highly organized epitope map in the olfactory bulb. *Cell* **79**:1245–  
320 1255.
- 321 Sánchez-Guardado LO, Ferran JL, Mijares J, Puelles L, Rodríguez-Gallardo L, Hidalgo-Sánchez  
322 M. 2009. Raldh3 gene expression pattern in the developing chicken inner ear. *J Comp*  
323 *Neurol* **514**:49–65. doi:10.1002/cne.21984

- 324 Schaffer ES, Stettler DD, Kato D, Choi GB, Axel R, Abbott LF. 2018. Odor Perception on the  
325 Two Sides of the Brain: Consistency Despite Randomness. *Neuron* **98**:736-742.e3.  
326 doi:10.1016/j.neuron.2018.04.004
- 327 Shepherd GM, Shepherd . Synaptic organization of the brain Gordon M. 1990. The Synaptic  
328 organization of the brain, 3rd ed. ed. New York : Oxford University Press.
- 329 Snippert HJ, van der Flier LG, Sato T, van Es JH, van den Born M, Kroon-Veenboer C, Barker  
330 N, Klein AM, van Rheenen J, Simons BD, Clevers H. 2010. Intestinal crypt homeostasis  
331 results from neutral competition between symmetrically dividing Lgr5 stem cells. *Cell*  
332 **143**:134–144. doi:10.1016/j.cell.2010.09.016
- 333 Sosulski DL, Bloom ML, Cutforth T, Axel R, Datta SR. 2011. Distinct representations of  
334 olfactory information in different cortical centres. *Nature* **472**:213–216.  
335 doi:10.1038/nature09868
- 336 Vassar R, Chao SK, Sitcheran R, Nuñez JM, Vosshall LB, Axel R. 1994. Topographic  
337 organization of sensory projections to the olfactory bulb. *Cell* **79**:981–991.
- 338 Wang F, Nemes A, Mendelsohn M, Axel R. 1998. Odorant receptors govern the formation of a  
339 precise topographic map. *Cell* **93**:47–60.
- 340 Yu Y-C, Bultje RS, Wang X, Shi S-H. 2009. Specific synapses develop preferentially among  
341 sister excitatory neurons in the neocortex. *Nature* **458**:501–504. doi:10.1038/nature07722
- 342 Yu Y-C, He S, Chen S, Fu Y, Brown KN, Yao X-H, Ma J, Gao KP, Sosinsky GE, Huang K, Shi  
343 S-H. 2012. Preferential electrical coupling regulates neocortical lineage-dependent  
344 microcircuit assembly. *Nature* **486**:113–117. doi:10.1038/nature10958

345 **Figures**

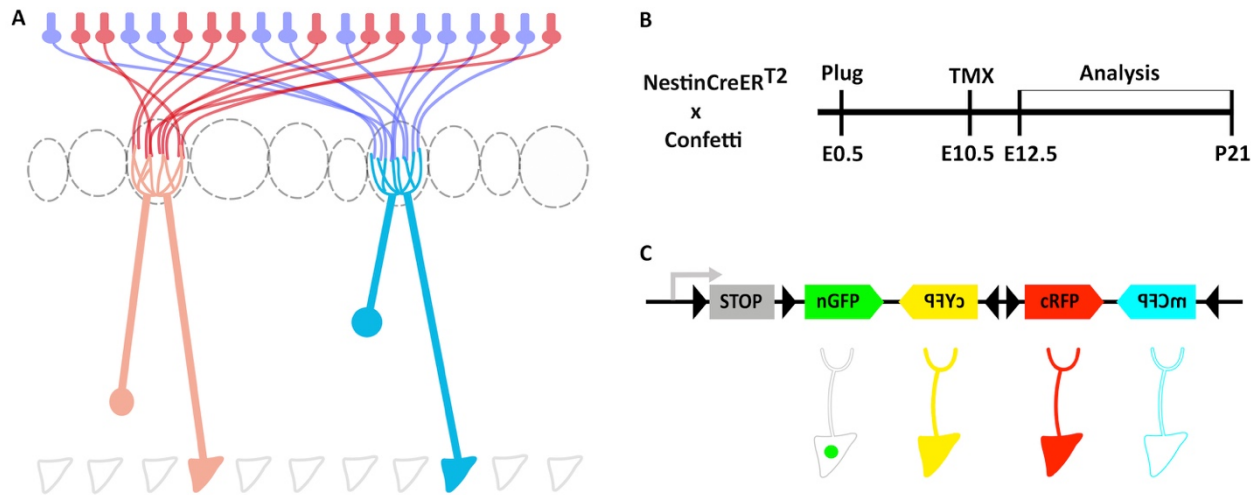

346 **Figure 1. Clonal analysis of projection neurons using *Nestin-CreER<sup>T2</sup>::Confetti* mice to**  
347 **sparsely label neuronal progenitors**

348 (A) Schematic representation of the olfactory bulb (OB). Axons from olfactory sensory neurons  
349 (OSNs) expressing the same receptor project to a single glomerulus, forming synaptic contacts  
350 with the apical dendrites of mitral and tufted cells. (B) Experimental design to label neuronal  
351 progenitors with tamoxifen (TMX) at embryonic day 10 (E10.5) and their posterior analysis at  
352 E12.5 and P21. (C) The *Confetti* cassette encodes 4 different fluorescent proteins (nuclear GFP  
353 (nGFP), membrane CFP (mCFP), and cytoplasmic YFP (cYFP) and RFP (cRFP)). Upon Cre  
354 recombination, the STOP sequence is excised and randomly generates four possible outcomes.



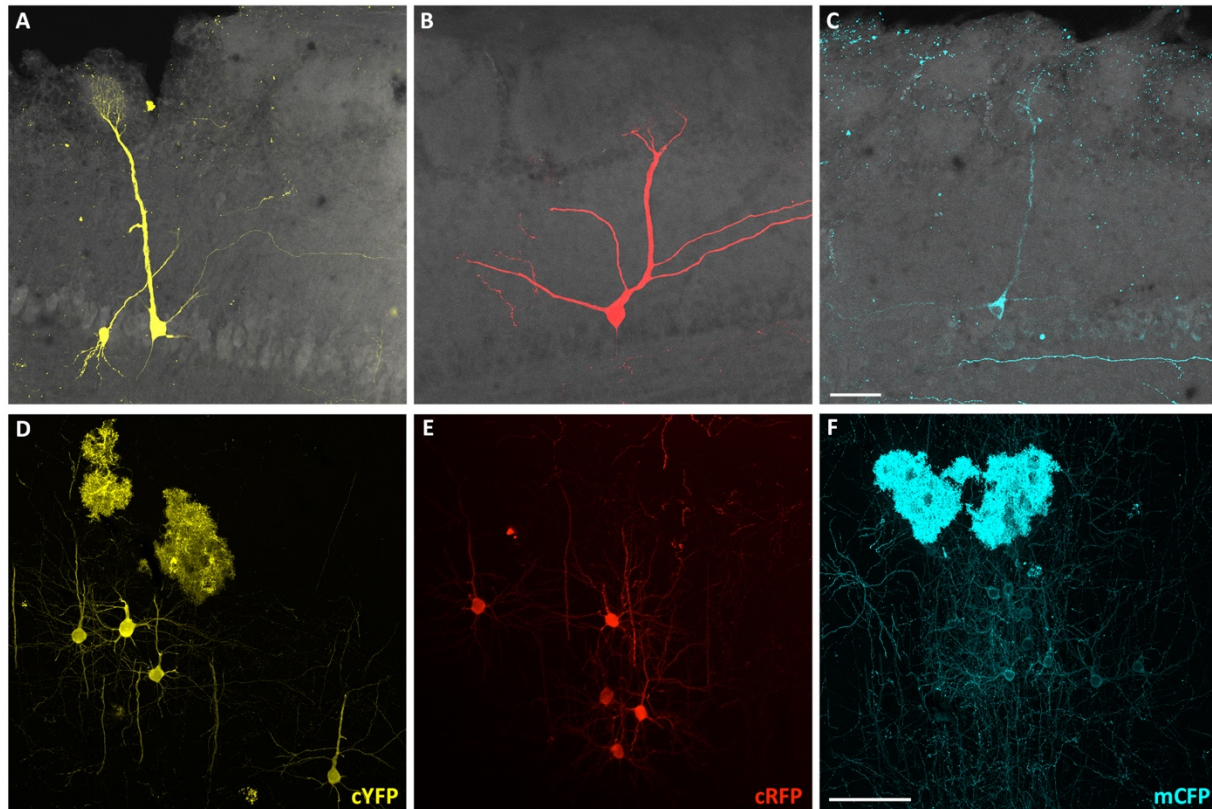

355 **Figure 1-figure supplement 1. Pyramidal and M/T neurons labeled with different fluorescent**  
356 **proteins.**

357 (A-C) Confocal images of three M/T cells and (D-F) three pyramidal neuron clones labeled with  
358 different fluorescent proteins in OB and neocortex coronal sections of P21 mice treated with TMX  
359 at E10.5. (A, D) Cytoplasmic YFP (cYFP); (B, E) cytoplasmic RFP (cRFP) and (C, F) membrane  
360 CFP (mCFP). Scale bar in C is 50  $\mu\text{m}$ . Scale bar in F is 100  $\mu\text{m}$ .

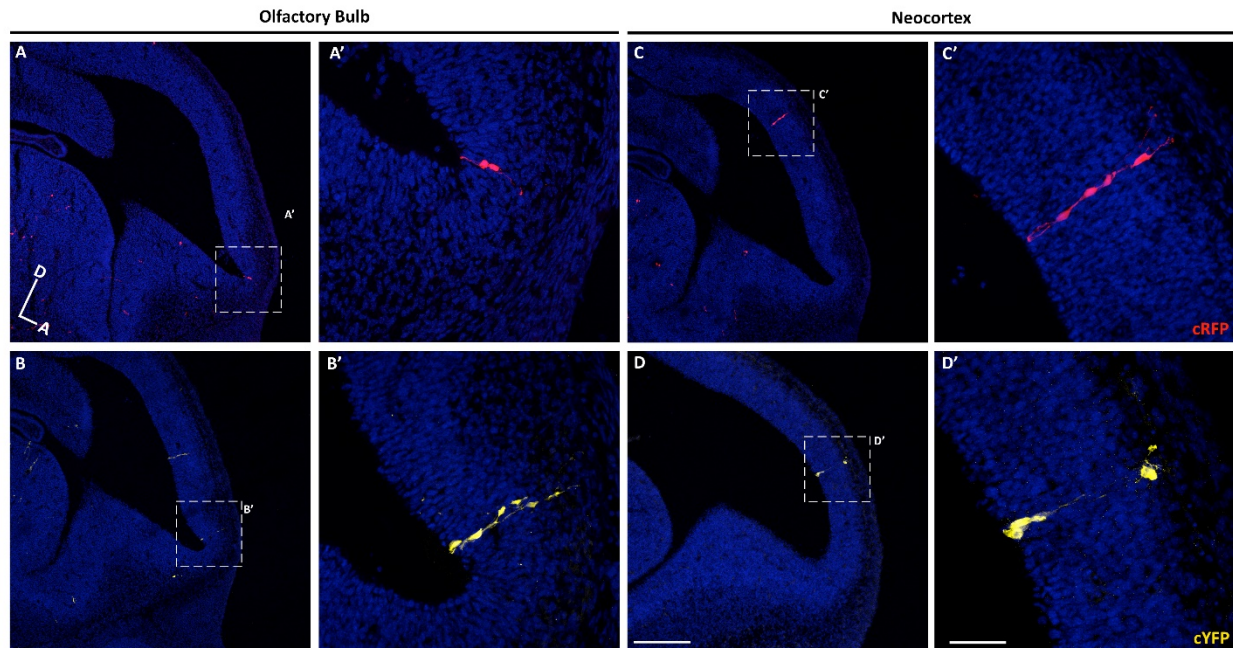

361 **Figure 2. Sparse labeling of progenitor cells in the embryonic mouse brain.**

362 (A-D) Sagittal sections through the brain of an E12.5 mouse treated with TMX at E10.5. (A-B)  
363 Confocal images of individual clones labeled in the OB expressing cRFP (A-A') and cYFP (B-  
364 B'). (A'-B') High magnification images of the clones showed in A and B. (C-D) Single clones  
365 labeled in the neocortex expressing cRFP (C-C') and cYFP (D-D'). (C'-D') High magnification  
366 images of the clones showed in C-D. Cell nuclei are labeled with DAPI (blue). Scale bar in D is  
367 200  $\mu\text{m}$  and applies to A-D, scale bar in D' is 50  $\mu\text{m}$  applies to A'-D'. Orientation of brains: D,  
368 dorsal; A, anterior.



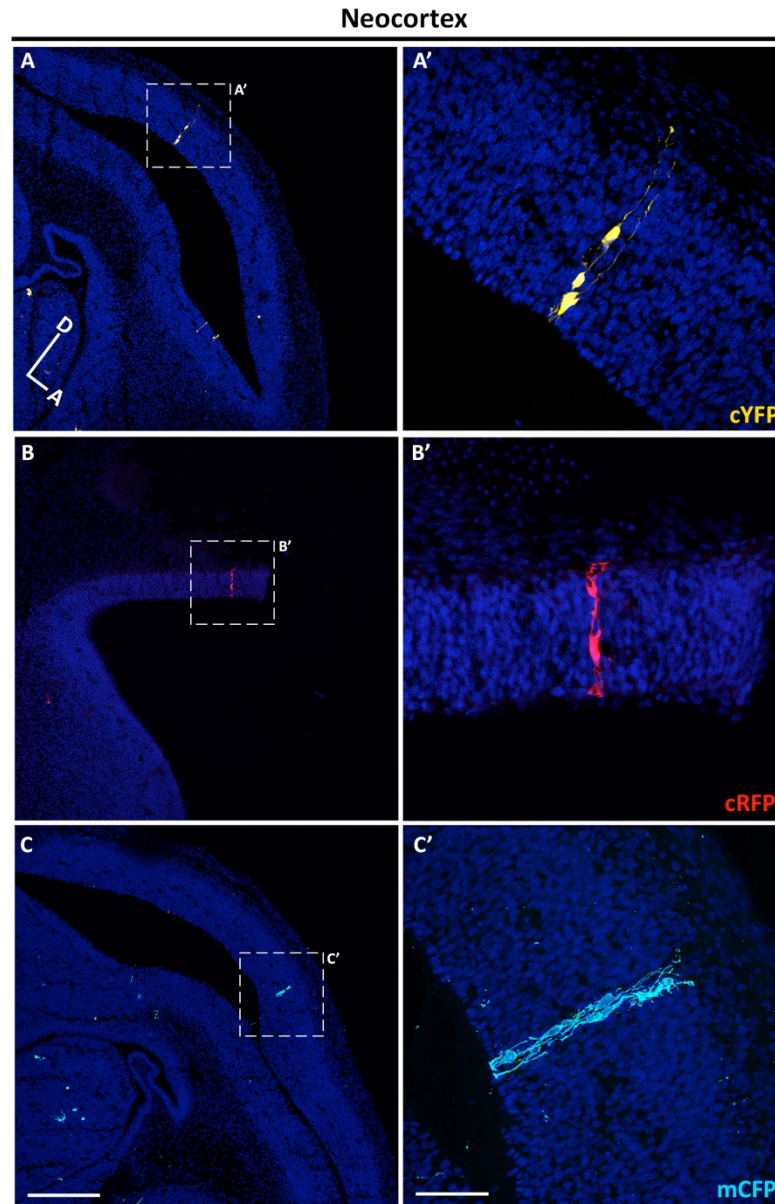

369 **Figure 2-figure supplement 1. Progenitor cells labeled in neocortex with three different**  
370 **fluorescent proteins.**

371 (A-C) Confocal images of single clones labeled in the neocortex with cYFP (A), cRFP (B) and  
372 mCFP (C) in brain sagittal sections of E12.5 mice treated with TMX at E10.5. (A'-C') High  
373 magnification images of the clones showed in A-C. DAPI staining (blue) reveals cell nuclei. Scale  
374 bar in C is 200  $\mu\text{m}$  applies to A-C. Scale bar in C' is 50  $\mu\text{m}$  applies to A'-C'. Orientation of brains:  
375 D, dorsal; A, anterior.

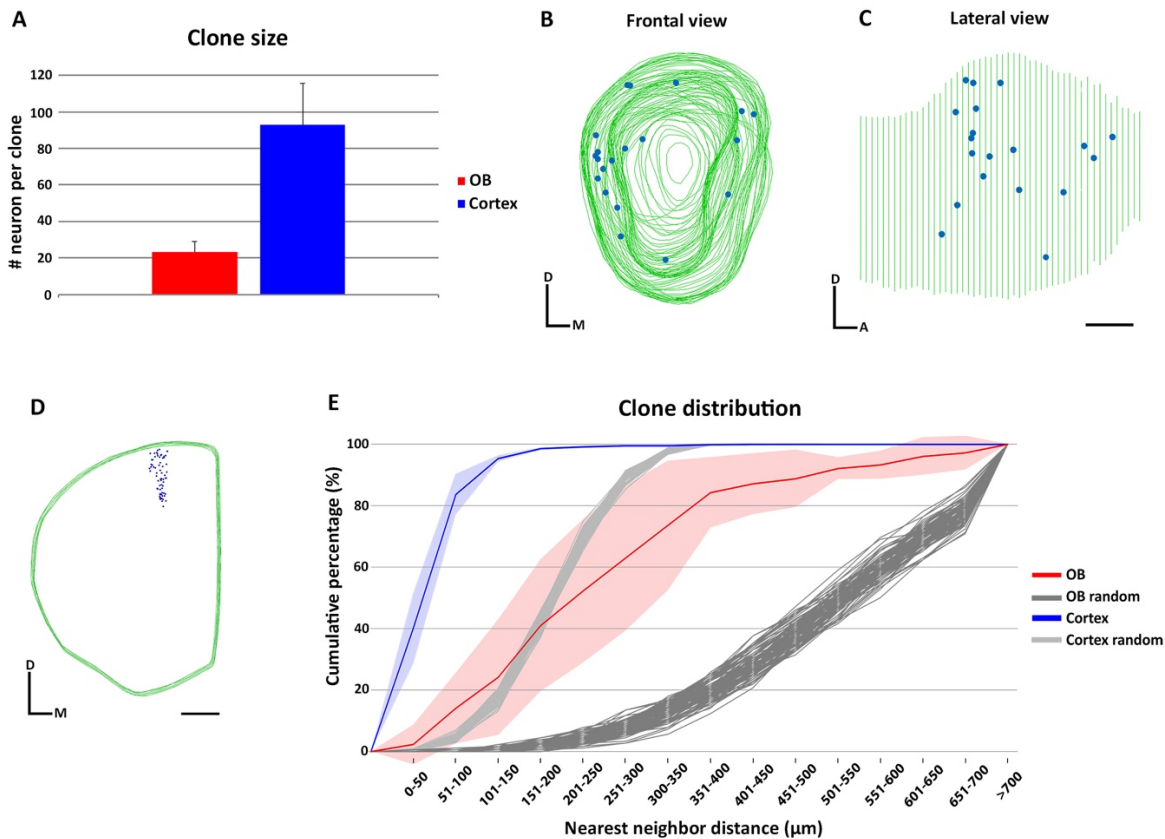

376 **Figure 3. Clone size and distribution of cells labeled in the olfactory bulb and neocortex.**

377 (A) Clone size quantification in the OB and neocortex. Data are shown as average  $\pm$  standard  
378 deviation. (B-D) 3D reconstruction of a *NestinCreER<sup>T2</sup>::Confetti* P21 mice OB (B-C) and  
379 neocortex (D) treated with TMX at E10.5. Green lines indicate the contours of the brain and blue  
380 dots represent the cell bodies of labeled neurons. (B) Frontal and (C) lateral views of the 3D  
381 reconstruction of one OB. (D) Frontal view of the neocortex 3D reconstruction. (E) Cumulative  
382 percentage of the NNDs of sister neurons labeled in the OB (red) and neocortex (blue). Data are  
383 shown as average  $\pm$  standard deviation (OB, n=178 neurons in 9 clones; neocortex, n=556 neurons  
384 in 6 clones). Dark and light gray lines represent 100 datasets of random simulations of OB and  
385 neocortex NND, respectively. Scale bar in C is 0.5 mm and applies to B-C. Scale bar in D is 1  
386 mm. Orientation of diagrams in B-D: D, dorsal; A, anterior; M, medial.

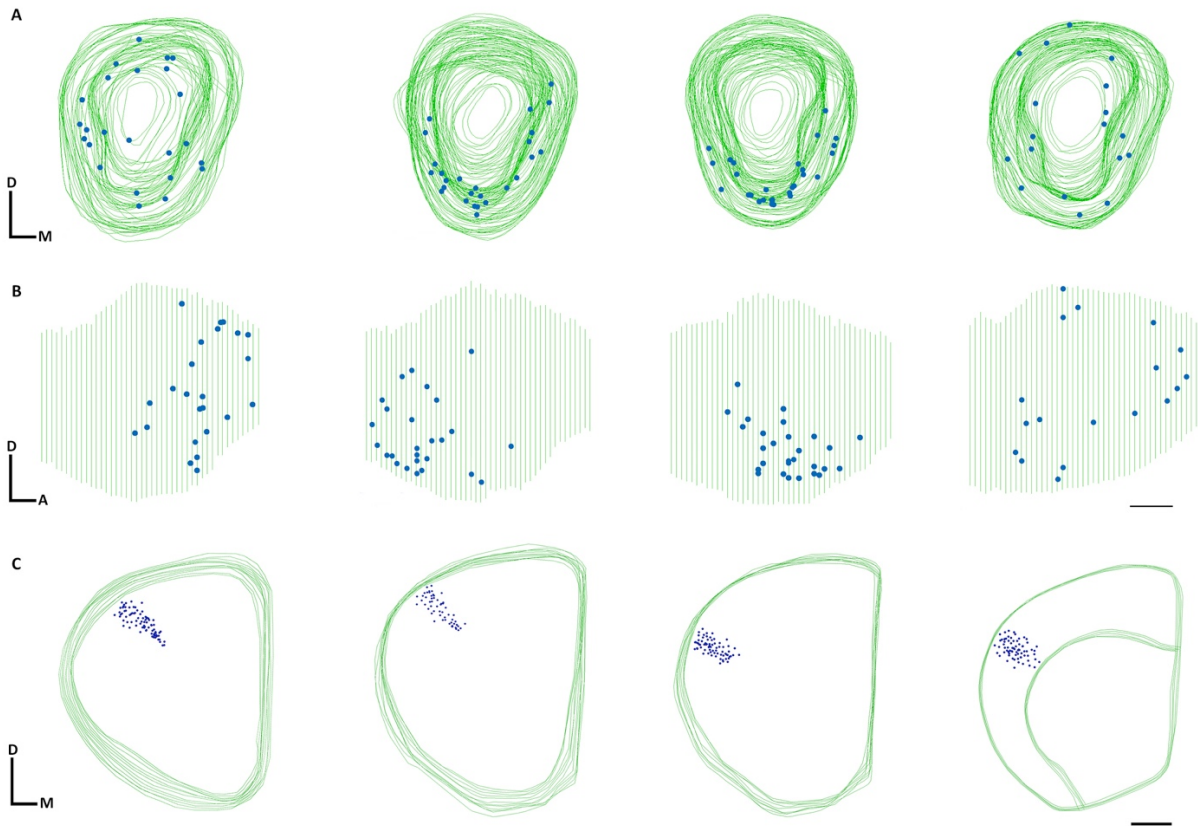

387 **Figure 3-figure supplement 1. 3D reconstruction of clones labelled in the olfactory bulb and**  
388 **neocortex**

389 (A-B) 3D reconstructions from four individual clones in the OB. (A) Frontal and (B) lateral views  
390 of the OBs. (C) 3D reconstructions from four single clones in the neocortex. Scale bar in B is 0.5  
391 mm and applies to A-B. Scale bar in C is 1 mm. Orientation of diagrams: D, dorsal; A, anterior;  
392 M, medial.

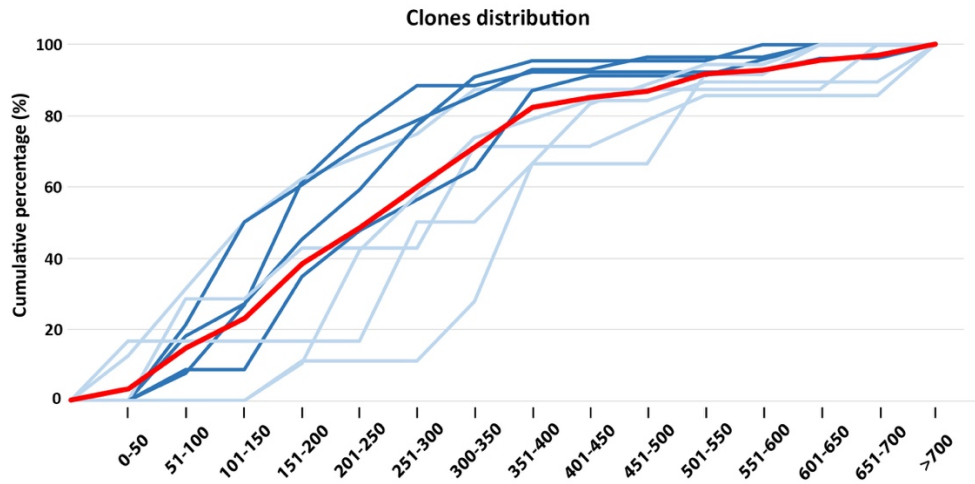

393 **Figure 3-figure supplement 2. NND distribution of single clones based on their cell number**

394 (A) NND cumulative percentage of individual clones analyzed in the OBs (n=9). Red line  
395 represents the NND average of all clones analyzed, while dark and light blue represent the NND  
396 of single clones containing clone sizes above or below the mean (mean=19.7), respectively.

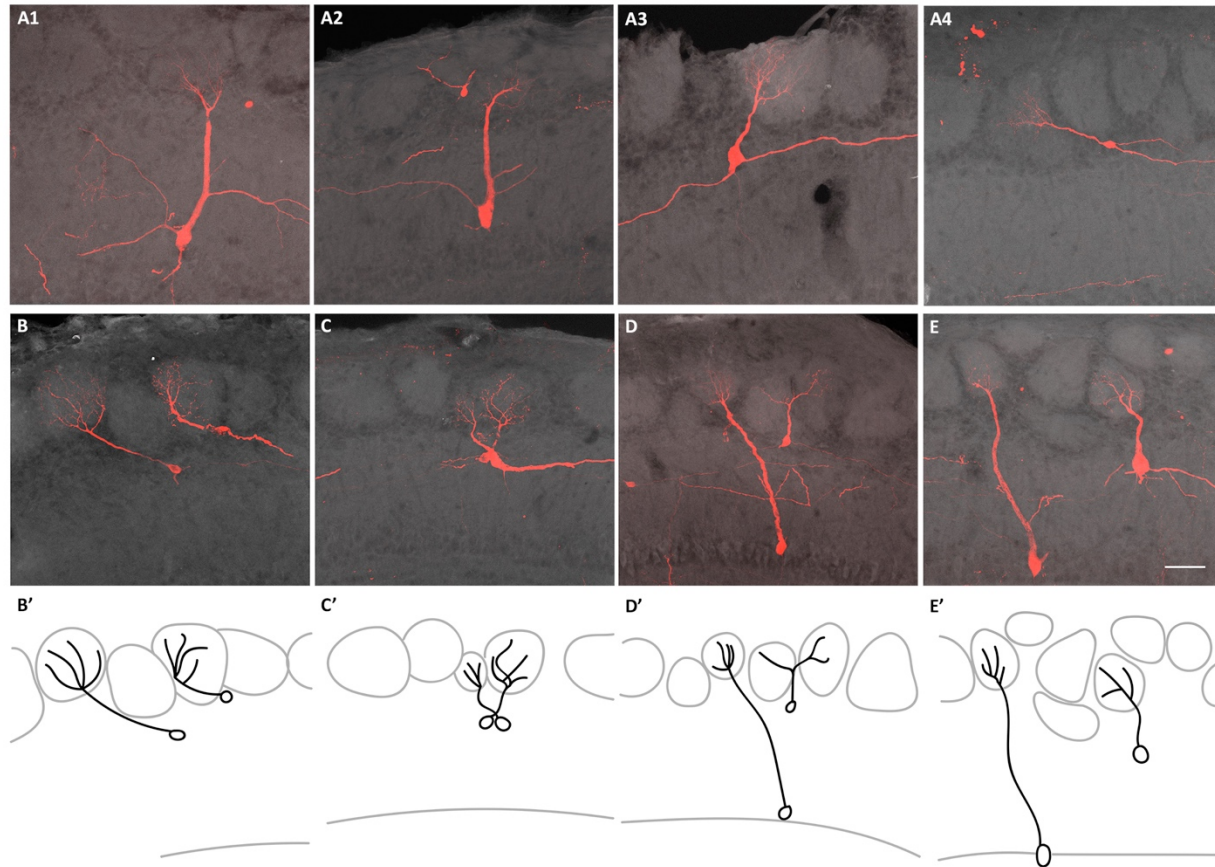

397 **Figure 4. Connectivity clonally related M/T cells.**

398 (A) Confocal images of four sister M/T cells belonging to a putative individual clone in the OB  
399 (B-E) Confocal images of sister M/T cells from four clones, in four different OBs, with their  
400 somata close to each other and their apical dendrites innervating different glomeruli. (B'-E')  
401 Schematic representation of the confocal images in B-E. Scale bar in E is 50  $\mu\text{m}$  and applies to  
402 A-E.
